# Supplementary material for: A Neuron-Based Screening Platform for Optimizing Genetically-Encoded Calcium Indicators
Source: PubMed Central journal article supplement (PMC3796516; doi:10.1371/journal.pone.0077728), 2013-10-14
Supplement: pone.0077728.s003.pdf [file pone.0077728.s003.pdf]

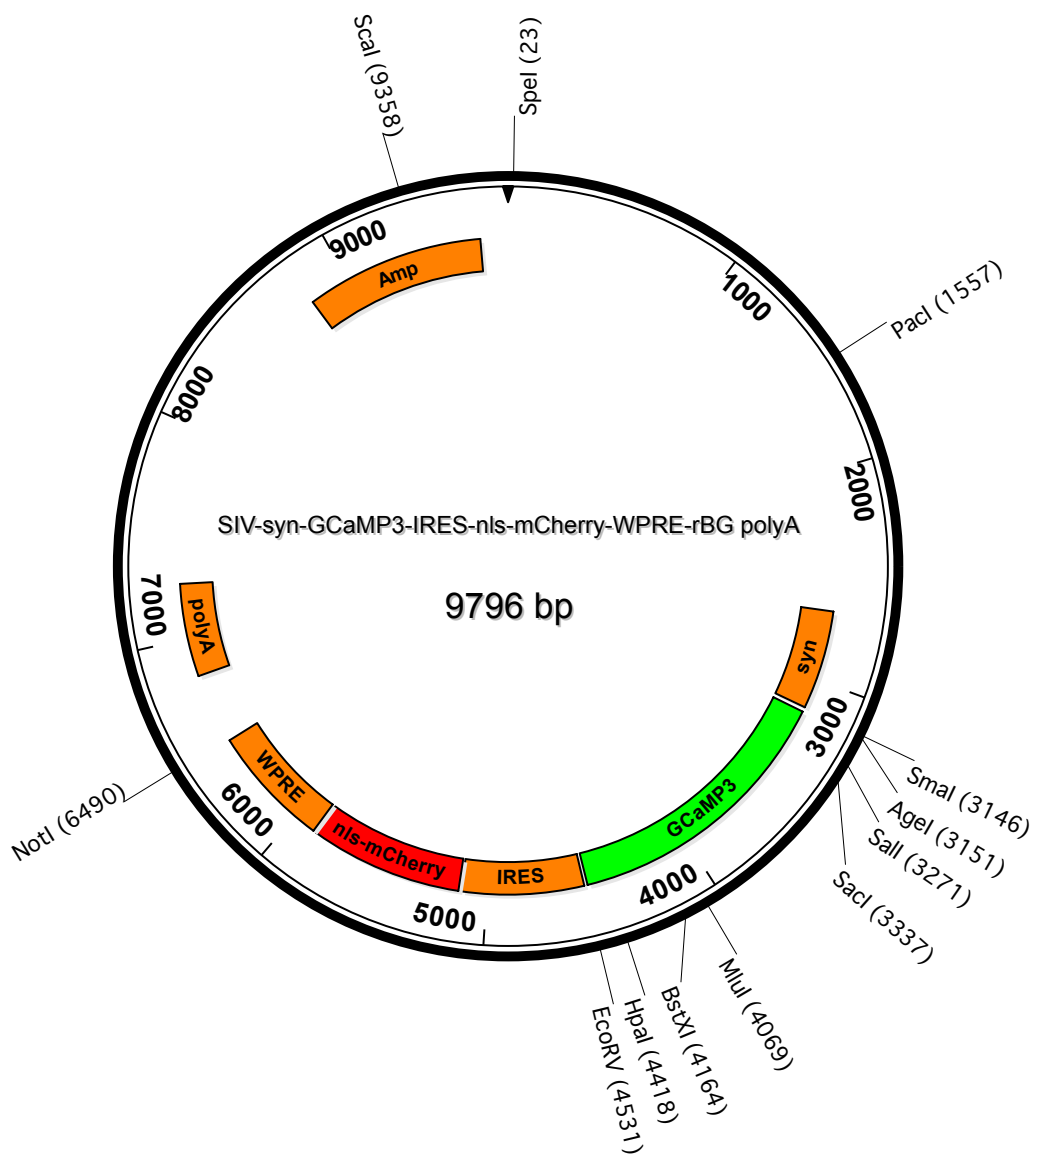

LOCUS SIV-syn-GCaMP3-IRES-nls-mCherry-WPRE-rBG polyA 9796 bp DNA circular  
 FEATURES Location/Qualifiers  
 misc\_feature 2666..3141 /note="syn"  
 misc\_feature 4534..5123 /note="IRES"  
 misc\_feature 5136..5870 /note="nls-mCherry"  
 misc\_feature 5888..6476 /note="WPRE"  
 misc\_feature 8804..9664 /note="Amp"  
 misc\_feature 3165..4517 /note="GCaMP3"  
 misc\_feature 6816..7263 /note="rabbit beta-globin polyadenylation signal"

ORIGIN  
 1 gtcgatcgac attgattatt gactagtatt taatagtaat caattacggg gtcattagtt  
 61 catagcccat atatggagtt ccgcgttaca taacttacgg taattggccc gcttggtgta  
 121 cgcgccaacg acccccgccc attgacgtca ataatagacg atgttcccat agtaacgcca  
 181 ataggactt tccattgacg tcaatgggtg gactatttac ggtaaaactg ccaacttggca  
 241 gtacatacaag tgtatcatat gccaaagtacg cccctattg acgtcaatga cggtaaatgg  
 301 cccgcctggc attatgccca gtacatgacc ttatgggact ttctacttgg gcagtacatc  
 361 tacccttctt aacatggctg acaagaagga aactagatga gacagcaggg actttccaca  
 421 aggggtgta cggggaggta ctggggagga gccggctcgg aacaccacct ttcttgatgt  
 481 ataaatatca ctgcattttg ctatgtagtc agtcgctcgt cggagaggct ggcagattga  
 541 gccctgggag gttctctcca gcaactagcag gttagagcctg ggttttccct gctagactct  
 601 caccagcact tggccggtgc tgggcagagt gactccacgc ttgcttgctt aaagccctct  
 661 tcaataaagc tgccatttta gaagtaagct agtgtgtgtt cccatctctc ctagtctgct  
 721 cctggtaaac tccgtactcg gtaataagaa gaccctggct tgttaggacc ctttctgctt  
 781 tgggaaccg agcaggaaaa atccctagca gattggcggc cgaacaggga cttgaaggag  
 841 agtgagagac tcctgagtag gctgagtaga aggcagtagg ggcggcagga accaaccagg  
 901 acggaagtgc cctataaagg ccggtgctcg taccagacgg cgtgaggagc gggagaggaa  
 961 gaggcctccg gttgcaggta agtgcaacac aaaaaagaaa tagctgtctt ttatccagga  
 1021 agggataata agatagagtg ggagatgggc gcgagaaact ccgtcttctc agggaaagaa  
 1081 gcagatgaat tagaaaaaat taggctacga cccaacggaa agaaaaagta catgttgaag  
 1141 catgtagtat gggcagcaaa tgaattagat agatttggat tagcagaaaag cctgttggag  
 1201 aacaagaag gatgtcaaaa aataacttgc gttcttagct cattagtccc aacagctca  
 1261 aaaaatttaa aaagccttta taatactgtc tgcgtcatct ggtgcaatca cgcagaagag  
 1321 aaagtgaaac acactgagga agcaaaacag atagtacaga gacacagagg aagagcaca  
 1381 tacaatccac agagtcaggg agtagtggaa gcaatgaatc accacctgaa aatcaata  
 1441 gatagaatca gggaaacaag caaattcagta gaaacctag tattaatgag agttcattcg  
 1501 atgaatttta aaagaagggg aggaacaggg gatatgactc cagcagaaaag attaattaac  
 1561 atgatcacta cagaacaaga aatacaatct caacaatcaa aaaactcaaa atttaaaaat  
 1621 tttcgggtct attacagaga aggcagagat caactgtgga agggaccctg tgagctattg  
 1681 tggaaaaggg aaggagcagt catcttaaag gttaggacag acattaaagt agtaccacga  
 1741 agaaaggcta aaattatcaa agattatgga ggagaaaag agatggatag cagtctccac  
 1801 atggaggata cgggagaggc tagagaggtg gcatagcctc atacaattcg attggaattg  
 1861 ggagattata aattagttaga gatcactcca attggtctg cccccacaaa tgtgaggagg  
 1921 tacactactg gtggcactcc aagaaataaa agaggggtct ttgtgctagg gttcttgggt  
 1981 tttctcgcaa cggcagggtt tgcaatgggc ccgctcgtct tgacgctgac cgtcagctcc  
 2041 cggactttat tggctgggat agtgcaagca cagcaactgc tgttggagct ggtcaagaga  
 2101 caacaagaat tggttgcgact gaccgtctgg ggaacaaga acctccagac tagggctact  
 2161 gccatcgaga aataactaaa ggaccaggcg cagctgaaag cttggggatg tgcgtttaga  
 2221 caagtctgcc acactactgt accatggcca aatgcaagtc taacacaaa gtggaacaat  
 2281 gagacttggc aagagtgagg gcgaaaggtt gacttcttgg aggaaaat ataacgcctc  
 2341 cttagaggag cacaaattca acaagagaag aacatgtatg aattacaaaa gttaaatagc  
 2401 tgggagtgtg ttggcaattg gtttgacctt gcttcttggg taaagtatat acaatagga  
 2461 gtttatataag ttgtaggagt aatactgtta agaataagta tctatagat acaaatgcta  
 2521 gctaaagttaa ggcaagggtg taggccagtg ttctcttccc caccctctta tttccagtag  
 2581 acccatalcc aacaggacca gccactgcca accagagaag gcaaaagagg agacgggtga  
 2641 gaaggcgggt gttcgaacgc gccgtctgca gaggccctg cgtatgagtg caagtgggtg  
 2701 ttaggaccgg gatgaggcgg ggtgggggtg cctacctgac gaccgacccc gaccactggg  
 2761 acaagcacc aacccccatt ccccaaatgg gcgatccctc atcagagagg gggaggggaa  
 2821 acaggatgcg gcgagcgcgc tgcgcaactg cagcttcaag acccgggaca gtcctctcgc  
 2881 ccccgctcgg cggcgcgcgc caccgcccgc tcagcactga aggcgcgctg acgtcactcg  
 2941 cggctcccc gcaaaactccc ctccccggcc accttggctg cgtcccgccc gcccgccgpc  
 3001 cagccggacc gcaccacgcg aggcgcgaga tagggggcca cgggcgcgac catctgcgct  
 3061 gcggcgcggc cgactcagcg ctgcctcagt ctgcggtggg cagcggagga gtcgtgtcgt  
 3121 gcctgagagc gcagtcgaga aaccgggaa ccggtgcgcc caccatgggt tctcatcatc  
 3181 atcatcatca tggatggct agcatgactg gtgacagca aatgggtcgg gatctgtacg  
 3241 acgatgagca taaggatctc gccaccatgg tcgactcact acgtcgttag tggataaaga  
 3301 caggtcacgc agtcagagct ataggtcggc tgagctcact cgagaagctc tatatcaag  
 3361 ccgacaagca gaagaacggc atcaaggcga acttcaagat ccgccacaac atcgaggagc  
 3421 gcggcgtgca gctcgcctac cactaccagc agaacacccc catcggcgac ggccccgtgc  
 3481 tgctgcccga caaccactac ctgagcgtgc agtccaaact ttcgaaaagc cccaacgaga  
 3541 agcgcgatac catggtcctg ctggagttcg tgaccgccc cgggatcact ctggcagatg  
 3601 acgagctgta caaggcgggt accggaggga gcatggtgag caaggcgag gagctgttca  
 3661 cgggggtggt gcccatcctg gtcgagctgg ccggcagact aaacggccac aagttcagcg  
 3721 tgtccggcga gggtaggggc gatgccacct accgcaagct gaccctgaag ttcactgca  
 3781 ccaccggcaa gctgccctg cctggcccca cctcgtgac caccctgacc tacggcgtgc  
 3841 agtgcttca cggctaccgc gaccacatga agcagcacga cttcttcaag tccgcatgc  
 3901 ccgaagcgtc catccaggag ccaccatct tcttcaagga cgcagggcaac tacaagacc  
 3961 gcgcccaggt gaagtctgag ggcgacaccc ttggtgaacc catcagagct aggggatcgc  
 4021 acttcaagga ggacggcaac atcctggggc acaagctgga gtacaacacg cgtgaccaac  
 4081 tgactgaaga gcagatcgca gaatttaaag aggtcttctc cctatttgac aaggacgggg  
 4141 atgggacaat aacaaccaag gagctgggga cgggtgagcg gttcttgggg cagaacccca  
 4201 cagaagcaga gctgcaggac atgatcaatg aagtagatgc cgacggtgac ggcacaatcg  
 4261 acttccctga gttcttgaca atgatggcaa gaaaaatgaa agacacagag agtgaagaag  
 4321 aaattagaga agcgttccgt gtgtttgata aggatggcaa tggtcatatc agtgcagcag  
 4381 agcttccgca cgtgatgaca aaccttggag agaagttaac agatgaagag gttgatgaa  
 4441 tgatcagggg acagacatc gatggggatg gtcaggtaaa ctacgaagag tttgtacaaa  
 4501 tgatgcagcg gaagtaaggt gtacaaaagt atcccccccc ccccccccc cctcaccct  
 4561 ccccccccc taacgttact ggccgaagcc gcttggaaat agggcgggtg gcgtttgtct  
 4621 atatgttatt ttccaccata ttgcccctct ttggcaatgt gggggcccgg aaacctgggc  
 4681 ctgtctctct gacgacatc cctaggggtc ttccccctct cgccaaaagga atgcaaggtc  
 4741 tgttgaatgt cgtgaaggaa gcagttcctc tggaaagctc ttgaagacaa acaactcgtc

4801 tagcgacct ttgcaggcag cggaaacccc cacctggcga caggtgcctc tgcggccaaa  
4861 agccaactgt ataatagaca cctgcaaaag cggcacaacc ccagtgccac gttgtgagtt  
4921 ggaatgttgt ggaagagctc aaatggctct cctaagcgtc tcaacaagg ggctgaagga  
4981 tgcaccaag gtacccatt gtatggatc tgatctggg cctcgggtca catgctttac  
5041 atgtgtttag tcgaggttaa aaaaacgtct agggccccg aaccacgggg acgtggtttt  
5101 cctttgaaaa acacgatgat aatccgctgg ccacatgtt gcccaagaag aagaggaag  
5161 tcgtgagcaa ggcgaggag gataacatgg ccatcatcaa ggagttcatg cgttcaagg  
5221 tgacacatgga gggctcctg acggccaacg agtctagat cgagggcgag ggcgagggcc  
5281 gccctacga gggcaccacg accgccaagc tgaaggtgac caagggtgac cccctgccct  
5341 tcgctggga catcctgtcc cctcagttca tgcagggctc caaggcctac gtgaagcacc  
5401 ccgacacat cccgactac ttgaagctgt cctccccga gggcttcaag tgggagcgcg  
5461 tgatgaact cgagagcggc ggcgtggtga ccgtgacca ggactcctcc ctgcagagcg  
5521 gcgagttcat ctacaaggtg aagctgcgcg gcaccaact ccctccgac ggcctcgtaa  
5581 tgcaagaaga gaccatgggc tgggagggct cctccgagcg gatgtaccac gaggacggcg  
5641 ccttgaaggg cgagatcaag cagagggctg agctgaagga cggcgggcac tacgacgctg  
5701 aggtcaagac cactacaag gcccaagaag ccgtgcagct gcccgggccc tacaacgtca  
5761 acatcaagtt ggacatcacc tcccacaacg aggactacac catcgtggaa cagtacgaac  
5821 gcgctgaggg ccgccaactc accggcgcca tggacgagct gtacaagtaa gcggcctcgc  
5881 gccggccaat caacctctgg attacaaaat ttgtgaaaga ttgactggta ttcttaacta  
5941 tttgtctcct ttaacgctat gtggatacgc tgccttaaat cctttgtatc atgctattgc  
6001 ttcccgtatg gctttcattt tctcctcctt gtataaatcc tggttgctgt ctctttatga  
6061 ggagttgtgg ccggtgtgca gccaacgtgg cgtggtgtgc actgtgtttg ctgacgcaac  
6121 ccccactggt tggggcattg ccaccacctg tcaactcctt tccgggactt tgcctttccc  
6181 cctcctatt gccacggcgg aactcatcgc cgctgcctt gcccgctgct ggacaggggg  
6241 tcggctgttt ggcactgaca attcctggtt gttgcgggg aaatcatcgt cctttccttg  
6301 gctgctcggc tgtgttgcca cctggattct gcgggggag tcctctcgtc acgtcccttc  
6361 ggccctcaat ccagcggacc ttccctcccc cggctcgtc cgggctcgc ggctcttcc  
6421 gcgtctcgc cctcgcctcc agacagctcg gatcctcctt tgggcccctc ccccctgag  
6481 gccggcgcgc gccgcatcga tgcctatcac ggtaccctca agaacaatga gttacaatt  
6541 ggcaatagac atgtctcatt ttataaaaaga aaagggggga ctggaaggga ttattatag  
6601 tgcaagaaga caagatctgc attttgctat ttagctcagtc gctctgcgga gaggctggca  
6661 gattgagccc tgggaggttc tctccagcac tagcaggtag agcctggggt ttccctgcta  
6721 gactctcacc agcaactggc cggctgctgg cagagtgact ccacgctgc ttgcttaag  
6781 cctctctcaa taaagctca gctgctcggc ctgacagatc ttttccctc tgccaaaaat  
6841 tatggggaca tcatgaagcc ccttgagcat ctgactctgc gtaataaag gaatttatt  
6901 ttcattgcaa tagtgtgtg gaattttttg tgtctctcac tggaaagcag atatgggagg  
6961 gcaaatcatt taaaacatca gaatgagtat ttggtttaga gtttggcaac atatgccata  
7021 tgctgctcgc catgaacaaa ggtggctata aagaggtcat cagtatatga aacagcccc  
7081 tgctgtccat tccttattcc atagaaaagc cttgacttga ggttagattt tttttatatt  
7141 ttgtttgtg ttattttttt cttaaacatc cctaaaattt tccttacctg ttttactagc  
7201 cagatttttc ctctctcct gactactccc agtcatagct gtcctctctc tcttatgaa  
7261 atccctgac ctgcagccca agcttggcgt aatcatggtc atagctgttt cctgtgtgaa  
7321 atgttatcc gctcacaatt ccacacaaca tacgagccgg aagcataaag tgtaagcct  
7381 ggggtgcta atgagtgagc taactcacat taatgcggt gcgctcactg cccgcttcc  
7441 agtcgggaaa cctgtcgtgc cagcggatcc gcatctcaat tagtcagcaa ccatagctcc  
7501 gccctcaact ccgcccaccc ccgccctaac tccgcccagt tccgcccatt ctccgcccc  
7561 tggctgacta atttttttta ttatgcaga ggcgagggcc gcctcggcct ctgagctatt  
7621 ccagaagtag tgaggaggct tttttggagg cctaggcttt tgcaaaaagc taacttgttt  
7681 attgacgctt ataaggtta caaataaagc aatagcatca caaatttcc aataaagca  
7741 ttttttccct tgactctagc ttgtgttttg tccaaaactc tcaatgtatc ttatcatgct  
7801 tggatcgcg cattaatga atcgccaac gcgcggggag agggcggttg cgtatgggg  
7861 gctctccgc tctcctcctc actgactcgc tgcgctcgtt cgttcggctg cggcgagcg  
7921 tatcagctca ctcaaaagcg gtaatacggc tatccacaga atcaggggat aacgcaggaa  
7981 agaactgtg agcaaaaagc cagcaaaaag agcatcaca aaatcgagc tcaagtccag  
8041 cgtttttcca taggctccc cccctgagc agcatcaca aaatcgagc tcaagtccag  
8101 ggtggcgaaa cccgacagga ctataaagat accagggcgt tcccctgga agctccctc  
8161 tgcgctcgc tgttccgacc ctgcccgtta ccgataacct gtcgcccctt ctcccctcg  
8221 gaagcgtggc gctttctcaa tgcctcagct gtaggatctc cagttcgggt taggtcgtc  
8281 gctccaagct gggctgtgtc cagcaacccc ccgttcagcc cgaccctgc gccttatccg  
8341 gtaactatcg tcttgagctc aaccggtaa gacacgact atcgccactg gcagcagcca  
8401 ctggtacagc gattagcaga gcgaggtatg tagcggtgct tacagagttc ttgaagtggt  
8461 ggcttaacta cggctacact agaagacagc tatttggtat ctgcgctctg ctgaagccag  
8521 ttaccttcgg aaaaagagtt ggtagctctt gatccggcaa acaaacacc gctgtagcg  
8581 gtggtttttt tgtttgcaag cagcagatta cgcgcagaaa aaaaggatct caagaagatc  
8641 ctttgactct ttctacgggg tctgacgctc agtggaaacga aaactcagct taagggattt  
8701 tggctatgag attatcaaaa aggatcttca cctagatcct ttaaaatga aatgaagtt  
8761 ttaaatcaat ctaaaagtata tatgagtaaa cttggtctga cagttaccaaa tgcttaatca  
8821 tgagagcacc tatctcagcg atctgtctat ttgctctcct catagttgcc tgactccccg  
8881 tcgtgtagat aactacgata cgggagggct taccatctgg cccagtgctc gcaatgatac  
8941 cgcgagacc acgctcaccg gctccagatt tatcagcaat aaaccagcca gccggaggg  
9001 ccgagcgcag aagtgtcct gcaactttat ccgctccat ccagctctatt aattgtgoc  
9061 gggagctag agtaagtagt tcgccagtta atagtttgcg caacgttgtt gccattgcta  
9121 caggcatcgt ggtgtcacgc tcgtcgtttg gtatggcttc attcagctcc ggttcccaac  
9181 gatcaaggcg agttacatga tccccatgt tgtgcaaaaa agcggttagc tcttccgtc  
9241 ctccgactgt tgtcagaagt aagttggccc cagtggtatc actcatggtt atggcagcac  
9301 tgcataatct tcttactgtc atgccatccg taagatgctt ttctgtgact ggtgagtaact  
9361 caaccaagtc attctgagaa tagtgtatgc ggcgaccgag ttgctcttgc ccgctcctca  
9421 tacgggataa taccgcgcca catagcaaaa ctttaaaagt gctctcattt ggaaaaagtt  
9481 ctctggggcg aaaactctca aggatcttacc cgctgttgag atccagttcg atgtaacca  
9541 ctctgcacc caactgatct tcagcatctt ttactttcac cagcgtttct gggtgagcaa  
9601 aaacaggaag gcaaaaatgc gcaaaaaagc gaataagggc gacacggaaa tgttgaatc  
9661 teactactct cctttttcaa tattattgaa gcatttatga ggttattgt ctcatgagcg  
9721 gatacatatt tgaatgtatt tagaaaaata acaaaaatag ggttccgagc acatttcccc  
9781 gaaaagtgcc acctgg
